1 **FINGER REPRESENTATIONS IN PRIMARY SOMATOSENSORY CORTEX ARE**  
2 **MODULATED BY A VIBROTACTILE WORKING MEMORY TASK**

3

4 AUTHORS

5 Finn Rabe<sup>1</sup>, Sanne Kikkert<sup>1,2\*</sup>, Nicole Wenderoth<sup>1\*</sup>

6 AFFILIATIONS

7 <sup>1</sup>Neural Control of Movement Laboratory, Department of Health Sciences and Technology, ETH  
8 Zürich, Zürich, Switzerland.

9 <sup>2</sup>Spinal Cord Injury Center, Balgrist University Hospital, University of Zürich, Zürich, Switzerland.

10 \* Both authors contributed equally

11 ADDRESS

12 <sup>1</sup>August-Piccard-Hof 1, Building HPT, Floor E, 8093 Zurich, Switzerland

13 <sup>2</sup>Forchstrasse 340, 8008 Zurich, Switzerland.

14 CORRESPONDING AUTHOR

15 [rabef@ethz.ch](mailto:rabef@ethz.ch)

16 KEYWORDS

17 Working memory; Somatosensation; Somatotopy; Neural tuning; Vibrotactile; Primary  
18 somatosensory cortex

19 HIGHLIGHTS

- 20 • Multivariate approaches were used to identify finger specific representational changes  
21 during vibrotactile frequency discrimination.
- 22 • Vibrotactile working memory modulates somatotopic finger representations in  
23 contralateral S1 during the delay period, i.e. in the absence of any tactile stimuli

24

1

2 **ABSTRACT**

3 It is well-established that several cortical areas represent vibrotactile stimuli in somatotopic maps.  
4 However, whether such somatotopic representations remain active during the delay period of  
5 working memory (WM) tasks, i.e. in the absence of any tactile stimulation, is unknown. In our  
6 experiment, participants had to compare two tactile stimuli with different vibration frequencies  
7 that were separated by a delay period (memory condition) or they were exposed to identical stimuli  
8 but did not have to solve a WM task (no memory condition). Importantly, both vibrotactile stimuli  
9 were either applied to the right index or little finger. Analyzing the delay period, we identified a  
10 well-known fronto-parietal network of brain regions involved in WM but we did not find WM  
11 specific activity in S1. However, using multi-voxel pattern analysis (MVPA) and representational  
12 similarity analysis (RSA), we found that S1 finger representations were more dissimilar during the  
13 delay period of the WM condition than during the control condition. These results indicate that  
14 WM processes modulate the representational geometry of S1 suggesting that some aspects of the  
15 tactile WM content are represented in a somatotopic fashion.

16

## 1 1. INTRODUCTION

2 Topographic representations such as the somatotopic map in the somatosensory cortex have been  
3 shown to be ubiquitous in the cerebral cortex of mammals. They consist of orderly representations  
4 of receptor surfaces on different body parts (Kaas, 1993, 1997; Penfield & Boldrey, 1937; Silver &  
5 Kastner, 2009). These somatotopic maps are incredibly specific to the point where the sensation of  
6 each finger can be assigned to its own cortical region, so called finger representations (Besle et al.,  
7 2013; Martuzzi et al., 2014; Sanchez Panchuelo et al., 2018; Sanders et al., 2019).

8 Importantly, finger-specific somatosensory representations are not exclusively activated by  
9 tactile or proprioceptive stimulation, but they are also modulated through other mechanisms like  
10 (i) *attempted movements* which do not produce overt motor output or the associated tactile or  
11 proprioceptive feedback (Ariani et al., 2021; Guan et al., 2021; Kikkert et al., 2021) (ii) *observed*  
12 (Kuehn et al., 2018) or *actively imagined* touch (Schmidt & Blankenburg, 2019), (iii) or directing  
13 *attention* to a specific finger (Puckett et al., 2017).

14 Another mechanism that may modulate S1 activity is tactile working memory (WM) i.e.  
15 when somatosensory stimuli have to be kept in memory beyond the actual stimulation period for  
16 subsequent decision making (Christophel et al., 2017). Support for S1 involvement in tactile WM  
17 stems from neurophysiological research in non-human primates. Single-unit activity was recorded  
18 from the S1 hand area while subjects had to match an object with a specific surface to a previously  
19 presented surface stimulus (Y. D. Zhou & Fuster, 1996; Y.-D. Zhou & Fuster, 2000). The authors  
20 observed cells that were not only active while the tactile stimulus was present, but also sustained  
21 their firing during the WM delay period. This suggests that primary sensory cortices could serve as  
22 a memory buffer for stimulus information (D'Esposito & Postle, 2015), an idea that has been  
23 conceptualized as the 'sensory recruitment' model of WM (Katus et al., 2015; Pasternak & Greenlee,  
24 2005). According to this model, WM is maintained in those brain regions that are involved in  
25 encoding sensory stimuli.

26 However, human neuroimaging studies on vibrotactile WM have revealed mixed results as  
27 to whether S1 is activated during the delay period of information storage: Several studies have  
28 shown that the average activity level of S1 (as detected by a "mass-univariate" statistical approach)  
29 is not significantly larger during the WM delay period than during a control condition (for reviews  
30 see (Christophel et al., 2017). Dynamical causal modelling (DCM) estimates of interactions between  
31 brain regions suggested that during vibrotactile frequency discrimination somatosensory stimuli are

1 serially processed from S1 to secondary somatosensory cortex (S2;(Kalberlah et al., 2013), which  
2 matches findings in non-human primates (for review (Romo & Rossi-Pool, 2020).

3 Other studies, by contrast, have employed multi-voxel pattern analysis (MVPA) which can  
4 detect stimulus information in spatially distributed patterns of activation in a region of interest  
5 (ROI) (Weaverdyck et al., 2020). Neuroimaging studies utilizing MVPA found that features like  
6 vibratory frequencies were represented during the delay period, mainly in associative brain regions,  
7 i.e., posterior parietal and frontal regions (Schmidt et al., 2017; Wu et al., 2018). Interestingly,  
8 features of spatial layout stimuli could be decoded from S1 during the delay period (Schmidt &  
9 Blankenburg, 2018), even though such stimulus representations might fade out and in over time,  
10 especially when a temporal structure of the delay period can be anticipated (Rose et al., 2016).  
11 Similar to the aforementioned observations in non-human primates, during the delay period spatial  
12 layouts could be decoded from an area that usually represents the hand (Schmidt & Blankenburg,  
13 2018). This area has been characterized by its fine-grained finger representations (Besle et al., 2013;  
14 Martuzzi et al., 2014; Sanchez Panchuelo et al., 2018; Sanders et al., 2019). It is, however, unknown  
15 whether somatotopic finger representations are modulated by a tactile WM task. To answer this  
16 question, we combined fMRI with multivariate analysis techniques to explore whether finger  
17 representations in contralateral S1 are selectively modulated when tactile stimuli are kept in WM.  
18 Participants were asked to perform a vibrotactile frequency discrimination task on the index or  
19 little finger while we collected fMRI data. We argue that above chance level classification  
20 accuracies and greater representational dissimilarities indicate that brain activation patterns  
21 representing single fingers in S1 are highly specific, in accordance with the idea of narrow tuning  
22 curves in the S1 neuronal population (Detorakis & Rougier, 2014). Lower classification accuracies  
23 and dissimilarities between fingers, by contrast, indicate that S1 activity is less finger specific  
24 suggesting that tuning curves are broader. Importantly, multivariate analysis can reveal  
25 representational information even if the average Blood-oxygen-level-dependent (BOLD) response  
26 does not surpass a certain statistical threshold in univariate analyses. We hypothesized that if WM  
27 selectively activates S1, then we will observe finger selective activation patterns during the WM  
28 delay period, reflected by greater classification accuracies and representational dissimilarity than  
29 during no memory delay periods.

30

31

32

1  
2  
3

## 4        2. MATERIAL AND METHODS

### 5        2.1. PARTICIPANTS

6        Thirty young healthy volunteers (19 females; mean age= 24.48, SEM= 0.44) participated in our  
7        study. Our sample size was comparable to those in previous reports on fMRI decoding of WM  
8        content using discrimination tasks (Ester et al., 2009; Schmidt et al., 2017). All participants were  
9        neurologically intact and reported to be right-handed. All of them gave written informed consent  
10       and the study protocol was approved by the local ethics committee (BASEC-Nr. 2018-01078). Three  
11       participants had to be excluded due to excessive head motion based on our criterion (see  
12       ‘Preprocessing of fMRI data’ section for more detail).

### 13       2.2.       EXPERIMENTAL PROCEDURE AND TASKS

#### 14       2.2.1. TACTILE STIMULI

15       Vibrotactile stimuli (duration = 2s, sampling rate = 1kHz) were applied to the right index or right  
16       little finger using a MR-compatible piezoelectric device (PTS-T1, Dancer Design, UK). We selected  
17       these fingers as they have the largest inter-finger somatotopic distance (Besle et al., 2013; Ejaz et  
18       al., 2015; Kolasinski et al., 2016; Sanders et al., 2019), allowing us to robustly detect the modulation  
19       of somatotopic representations by the WM task. The one bin piezoelectric wafers were mounted to  
20       the fingertips using custom 3D-printed retainers that were fixed with a Velcro strap. Participants  
21       were asked to report any tingling sensation in case the retainer was mounted too tightly. The  
22       stimulation consisted of mechanical sinusoids that were transmitted from the testing computer to  
23       the piezoelectric device using a C Series Voltage Output Module (National Instruments) and the in-  
24       house NI-DAQmx driver.

#### 25       2.2.2. SENSORY DETECTION THRESHOLD ESTIMATION

26       To ensure similar task difficulty across runs of the main experiment (Harris et al., 2006), we  
27       determined the sensory detection threshold (SDT) for both fingers prior to starting the main  
28       experiment. SDT was defined as the stimulation intensity at which the participants detected the

1 stimulus 50% of the time. We stimulated each finger only once per trial at base frequency (20 Hz)  
2 and participants were asked to press a button upon detection of a stimulation. To reliably estimate  
3 SDT, we applied a conventional Bayesian-based Quest procedure (QuestHandler in PsychoPy).  
4 After each detected or undetected stimulus the algorithm searched for the most probable  
5 psychometric function via maximum likelihood estimation over the course of 25 trials starting with  
6 a stimulation amplitude of 0.1 Volts (Watson & Pelli, 1983). The Weibull psychometric function was  
7 calculated using the following formula:

$$(1) \Psi(x) = \delta\gamma + (1 - \delta)[1 - (1 - \gamma)\exp(-10\beta(x - T + \epsilon))]^{\gamma}]$$

8  
9  
10  
11 where  $x$  is the stimulus intensity in Volts and  $T$  is the estimated sensory detection threshold. This  
12 procedure was performed prior to the first run. If the percentage of correctly discriminated memory  
13 trials in a run was below 60% or above 90%, then we redetermined the SDT using a shortened  
14 version of the Quest procedure. In such a case we started the Quest procedure with the previously  
15 determined stimulation intensity to reduce the number of iterations (new iterations = 7 trials). This  
16 procedure was applied to keep task difficulty at comparable levels throughout the experiment.

17 We analyzed changes in behavioral performance occurred across runs, potentially due to  
18 perceptual learning, cooling of the fingertips, or fatiguing effects using a repeated measures two-  
19 way ANOVA (2 fingers x 4 runs) (**Fig. 2B**).

20

### 21 2.2.3. MAIN EXPERIMENTAL TASK

22 The main experimental task was generated using PsychoPy (Peirce et al., 2019). The experimental  
23 task consisted of memory and no memory trials. During a memory trial, participants performed a  
24 two-alternative forced choice (2AFC) discrimination task. Two vibrotactile stimuli were  
25 consecutively applied to the same finger (i.e., the index or the little finger), separated by a jittered  
26 6-8s delay. We targeted cutaneous mechanoreceptors that respond to stimulations in the flutter  
27 range (Mountcastle et al., 1967). One of two stimuli vibrated at 20 Hz (2s duration at SDT intensity)  
28 while the vibration frequency of the other stimulus varied between 22, 24 or 26 Hz (same duration  
29 and intensity). Participants had to indicate by means of a button press whether the first or the  
30 second stimulation was higher in frequency (half of the participants) or whether the first or the  
31 second stimulation was lower in frequency (the other half of the participants), following previously  
32 published procedures (Pleger et al., 2006, 2008, 2009). Responses were recorded via index and

1 middle finger button presses of the other (left) hand using a MR-compatible fiber optic device. We  
 2 randomized the order of how the response options (f1 and f2) appeared on the screen on a trial-by-  
 3 trail basis to prevent somatotopy-specific anticipatory motor activity. After a 3s response period  
 4 participants received visual feedback (1s) indicating whether their response was correct  
 5 (highlighted by green color) or incorrect (red; **Fig 1**). Participants were instructed to focus their  
 6 gaze on the fixation cross in the middle of the screen during the complete trial. Vibrotactile stimuli  
 7 trials targeted either the index or the little finger and which finger would be stimulated per trial  
 8 was counterbalanced across each run.

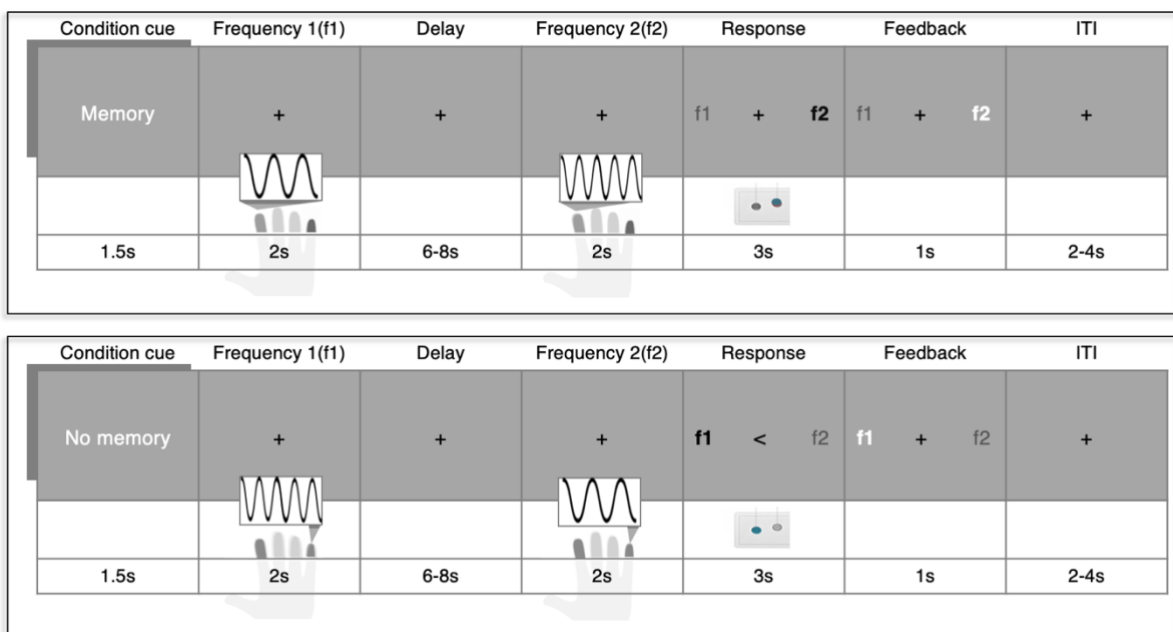

9  
 10 **Fig 1. Vibrotactile frequency discrimination task.** During memory trials (*top*) two vibrotactile stimuli that  
 11 differed in frequency were consecutively applied to the same finger (in this example the index finger). Both  
 12 stimulations were separated by a jittered delay period, during which participants had to keep the first  
 13 stimulation frequency (f1) in memory in order to compare it to the frequency of the second stimulus (f2).  
 14 During the 3s response period participants had to indicate which of the two stimulation frequencies (f1 and  
 15 f2) was higher by means of a left hand button press. The mapping between the discrimination response and  
 16 which button to press was indicated on the screen and randomized across trials. Subjects received feedback  
 17 whether their response was correct or incorrect. The target finger (index or little finger) were intermixed  
 18 within a run and the inter trial interval (ITI) was jittered between 2-4s. During no memory trials (*bottom*),  
 19 vibrotactile stimulations and visual information remained the same. However, participants were instructed  
 20 not to focus on the stimulation and also not to compare the vibrotactile frequencies. They simply had to press  
 21 the button indicated by the arrow in the middle of the screen.

1 To disentangle WM processes from general responses to the stimuli, we also included no  
2 memory trials. During a no memory trial participants received the exact same vibratory  
3 stimulations as during memory trials, but they were instructed not to focus on the stimuli or on  
4 their vibration frequencies. During the response period subjects were informed by a visual cue  
5 (pointing arrow) which button to press. To ensure participants did not switch cognitive strategies,  
6 the indicated response was always contrary to the response that would be expected when correctly  
7 discriminating both frequencies. Memory and no memory trials conditions were separated in mini  
8 blocks of 4 trials. Participants were informed whether they had to perform the memory or no  
9 memory task by means of a visual cue (1.5s) at the beginning of each trial. Prior to the experiment,  
10 participants were familiarized with the memory and no memory tasks by completing 12 trials.

11 The order of stimulus sites (stimulated finger) was counterbalanced both within and across  
12 mini blocks. Stimulation frequencies were counterbalanced across the experiment. Each stimulus  
13 frequency was presented equally often in both memory and no memory condition. Jittered timings  
14 for Inter-stimulus-interval (ISI, 6-8s) and Inter-trial-interval (ITI, 2-4s) were randomly drawn from  
15 a uniform distribution. All participants completed 4 runs consisting of 48 trials each. Each run  
16 consisted of 6 memory and 6 no memory mini blocks in a counterbalanced order.

### 17 2.3. BEHAVIORAL ANALYSIS

18 We defined the discrimination accuracy per participant as the percentage of correctly discriminated  
19 trials separately for each condition. We expected that greater frequency differences would facilitate  
20 discrimination between both tactile vibrations while the stimulus site should have no effect. We  
21 therefore investigated whether behavioral performances differed across frequency differences and  
22 across fingers using a two-way repeated-measures ANOVA.

23

### 24 2.4. MRI DATA ACQUISITION

25 Functional as well as structural MRI images were acquired on a Philips Ingenia 3 Tesla MRI (Best,  
26 The Netherlands) using a 32-element head coil. fMRI data was collected using an echo-planar-  
27 imaging (EPI) sequence acquiring 36 transversal slices centred at the bicommissural line and with  
28 whole brain coverage, though excluding most of cerebellum (repetition time (TR): 2s, echo time  
29 (TE): 30ms, spatial resolution: 3mm<sup>3</sup>, FOV = 222 × 222mm<sup>2</sup>, 85° flip angle, slice orientation:  
30 transversal, SENSE factor (AP): 2, 472 functional volumes per run). Anatomical images were



1 acquired during SDT estimation using a MPAGE T1-weighted sequence (TR = 7.7ms, TE = 3.6ms,  
2 FOV = 240 × 240mm<sup>2</sup>, flip angle: 8°, resolution: 1mm<sup>3</sup>, number of slices: 160, slice thickness: 2.2mm,  
3 slice orientation: sagittal).

4

## 5 2.5. PREPROCESSING OF FMRI DATA

6 Conventional pre-processing steps for fMRI data were applied to each individual run in native  
7 three-dimensional space, using FSL's Expert Analysis Tool FEAT (v6.00;  
8 [fsl.fmrib.ox.ac.uk/fsl/fslwiki](http://fsl.fmrib.ox.ac.uk/fsl/fslwiki)). The following steps were included: Motion correction using  
9 MCFLIRT (Jenkinson, 2002), brain extraction using automated brain extraction tool BET (Smith,  
10 2002), high-pass filtering (100Hz), slice-time correction, and spatial smoothing using a 3mm  
11 FWHM (full width at half maximum) Gaussian kernel using FEAT. Functional data was aligned to  
12 structural images initially using FLIRT (Jenkinson & Smith, 2001), and optimised using boundary-  
13 based registration (Greve & Fischl, 2009). BOLD EPI data was assessed for excessive motion using  
14 motion parameter estimates from MCFLIRT. If the functional data from a participant showed  
15 greater than 1.5mm (half the voxel size) of absolute mean displacement, this participant was  
16 excluded from all further analysis.

17 To reduce physiological noise artifacts, these CSF and white matter were used to extract  
18 scan-wise time series which were then added to the model as nuisance regressors in addition to the  
19 standard motion parameters.

20 Structural images were transformed to Montreal Neurological Institute (MNI) standard space using  
21 nonlinear registration (FNIRT), and the resulting warp fields were applied to the functional  
22 statistical images.

## 23 2.6. DEFINITION OF REGIONS OF INTEREST

24 We used each individual participant T1-weighted image to create a cortical surface reconstruction  
25 by means of Freesurfer (Fischl et al., 1999). We identified regions of interest (ROIs), specifically SI,  
26 anatomically for each subject based on the probabilistic Brodmann area parcellation provided by  
27 Freesurfer (Fischl, 2012). More specifically, an S1 hand ROI was defined by combining Brodmann  
28 areas (BA) 1, 2, 3a, and 3b. We then converted this S1 ROI to volumetric space. Any holes were  
29 filled and non-zero voxels were mean dilated. Next, the axial slices spanning 2cm medial/lateral to  
30 the hand area (Yousry et al., 1997) were identified on the 2mm MNI standard brain (min-max MNI  
31 z-coordinates=40-62). This mask was non-linearly transformed to each participant's native

1 structural space. Finally, we used this mask to restrict the S1 ROI and extracted an S1 hand area  
2 ROI. Similar ROI definition has been previously used (Diedrichsen et al., 2013; Ejaz et al., 2015;  
3 Wiestler & Diedrichsen, 2013). The S1 hand area ROI was used to both extract time-binned  
4 estimates as well as to decode information about the stimulus site during the delay period.

## 5 2.7. UNIVARIATE ANALYSIS

6 First-level parameter estimates were computed per run using a voxel-based general linear model  
7 (GLM) based on the gamma hemodynamic response function. Time series statistical analysis was  
8 carried out using FILM (FMRIB's Improved Linear Model) with local autocorrelation correction.

9 To find neural correlates of WM we contrasted beta estimates from the delay period during  
10 memory trials to those in no memory trials. We then used a fixed effects higher-level analysis to  
11 average activity across runs for each individual participant. Finally, to make inferences on the  
12 population level, we computed a mixed effects analysis (Flame 1). From this we obtained statistical  
13 group maps (Z-statistic images) for each contrast of interest, e.g. contrasting memory delay activity  
14 to no memory delay activity. Z-statistic images were thresholded using clusters determined by  $Z >$   
15 3.1 and statistical significance was determined at the cluster level ( $p < .05$  family-wise-error-  
16 corrected (FWE)).

17 To further explore whether finger specific activity levels were maintained in a somatotopic  
18 fashion, we first computed somatotopic ROIs by contrasting finger-specific activity during the first  
19 stimulation. We did this by contrasting activity associated with right index stimulations to right  
20 little finger stimulations, which elicited a finger specific map (finger cluster) in the lateral part of  
21 S1 while the reverse contrast revealed more medially located activity (**Fig. 3B**). These S1 activity  
22 maps were in line with previous findings on finger somatotopy.

23 We then compared z-scored beta estimates between trials where either the index or the  
24 little finger was stimulated within each finger ROI. Again, we computed a fixed-effects analysis as  
25 mentioned before. We extracted the beta estimates separately for each participant within each pre-  
26 defined finger cluster.

27 Information retention in WM is not always reflected by constant delay activity, especially  
28 when the duration of the delay period can be somewhat anticipated (Rose et al., 2016). WM delay  
29 activity has been shown to decrease until shortly before memory retrieval when the remembered  
30 stimulus information is reactivated as suggested by an increase of neural oscillations in the theta  
31 band (Rose et al., 2016). We therefore hypothesized that the BOLD activity level would vary in a

1 U-shaped fashion over the delay period. To test this hypothesis, we conducted a parametric  
2 modulation analysis. Our parametric modulation regressor was modelled to predict activity in three  
3 consecutive time-bins of the delay period in a U-shaped manner (**Fig. 3A**). The length of each time-  
4 bin equalled one TR (i.e., 2s). Since we jittered the delay period between 6 and 8 s, we only modelled  
5 the first three time-bins of the delay period (2-6s). The remaining time of the delay was modelled  
6 as a separate regressor of no interest. By contrasting memory and no memory trials, we obtained Z-  
7 statistic images. These images were thresholded using clusters determined by  $Z > 3.1$  and a  
8 familywise error-corrected cluster significance threshold of  $p < 0.05$  was applied to the  
9 suprathreshold clusters.

10 To further visualize the results of the parametric modulation, we extracted activity  
11 estimates per time-bin. To do so, we modelled each time-bin of the delay period separately in a  
12 voxel-based general linear model (GLM) based on the gamma hemodynamic response function. The  
13 remaining time of the delay was modelled as a separate regressor of no interest. We then extracted  
14 the z-scored estimates per time-bin within the previously defined S1 Hand area ROI. All statistical  
15 maps were overlaid onto a MNI152 standard-space T1-weighted average structural template image  
16 (**Appx. A.1 and B.2**) and projected onto a cortical surface using Connectome's Workbench (Marcus  
17 et al., 2011).

18

## 19 2.8. VARIANCE INFLATION FACTOR (VIF)

20 To test whether multicollinearity between the parameter estimates in our GLM was sufficiently  
21 low, we calculated the variance inflation factor (VIF). This represents how much the variance of an  
22 individual regressor can be explained due to correlation to other regressors in our model (Zuur et  
23 al., 2010). For each variable, VIF was computed by the following formula:

$$24 \quad VIF = \frac{Var(E)}{Var(X)}$$

25 where  $Var(E)$  reflects the mean estimation variance of all regression weights (stimulation and  
26 information storage regressors for each finger) while  $Var(X)$  reflects the mean estimation variance  
27 in case all regressors would be estimated individually. A VIF of 1 indicates total absence of  
28 collinearity between the regressor of interest and all other regressors in our GLM while a large VIF  
29 signals a serious collinearity problem. There is no clear threshold for acceptable multicollinearity.

1 Previous literature however recommends that the VIF is ideally smaller than 2.5 (Johnston et al.,  
2 2018). In our case, the VIF was 1.45, averaging across regressors reflecting the first stimulation, the  
3 delay and the second stimulation. We additionally computed the VIF for the regressors relating to  
4 the stimulation periods and the time-binned delay periods (i.e. stimulation one, delay (0-2s), delay  
5 (2-4s), delay (4-6s) and stimulation two). As expected, the resulting VIF was on average 11.38,  
6 signaling concerning multicollinearity. Since the WM related activity within the time-bins is  
7 correlated, this result was expected, but also means our findings of our time-binned analysis should  
8 be interpreted with caution.

## 9 2.9. MULTIVARIATE PATTERN ANALYSIS

### 10 2.9.1. MVPA

11 We used multi-voxel pattern analysis (MVPA) to decode which finger was stimulated based on  
12 activity during the delay period. This analysis was conducted for voxels within the S1 hand area  
13 mask that have been shown to possess fine-grained finger representations. First-level parameter  
14 estimates were computed for all events of each trial and each participant using a voxel-based general  
15 linear model (GLM) in SPM (v12) based on the gamma hemodynamic response function. This  
16 resulted in 192 beta estimates (48 trials x 4 runs) during the delay period per participant across both  
17 conditions. 96 beta estimates for each memory and no memory condition.

18 We trained a linear classifier (support vector machine, SVM) to predict which finger was  
19 stimulated in a specific trial based on the respective delay period activity using the nilearn toolbox  
20 (Abraham et al., 2014). We calculated classification accuracies using a leave-one-run-out cross-  
21 validation approach. The accuracies were averaged across folds, resulting in one accuracy per  
22 condition and per participant. To approximate the true chance level, we shuffled the condition  
23 labels using 1000 permutations (Ojala & Garriga, 2009), as implemented in the scikitlearn toolbox  
24 (Pedregosa, 2011). Then, we calculated permutation-based p-values based on the following formula:

$$25 \quad (2) \quad (C + 1) / (n\_permutations + 1),$$

26 where  $C$  is the number of permutation scores that were higher than the true accuracy. To assess the  
27 statistical significance of each ROI's decoding accuracy, we used one sample t-tests against the  
28 approximated chance level (Stelzer et al., 2013). We further used a paired t-tests to compare  
29 classification accuracies between the WM and non-WM conditions.

### 30 2.9.2. REPRESENTATIONAL SIMILARITY ANALYSIS (RSA)

1 RSA has the ability to identify the invariant representational structure of fingers independent of  
2 amplitude, shape and exact location of activated brain regions during the WM task (Ejaz et al.,  
3 2015). It allowed us to obtain a measure of how distinguishable somatotopic representations  
4 between working-memory and no working-memory trials are. We computed representational  
5 distances between activity patterns related to different fingers (index vs. little finger) for both  
6 working-memory and no working-memory conditions. The distances were obtained using a  
7 prewhitened crossvalidated Mahalanobis distances (Crossnobis distances, (Diedrichsen et al., 2013;  
8 Walther et al., 2016). We obtained voxel-wise parameter estimates (betas) for each finger \*  
9 memory condition \* timepoint versus rest (using univariate analysis) and residuals of our GLM  
10 within the hand area of S1. These betas were prewhitened using the residuals. Based on the  
11 prewhitened betas, we computed squared Mahalanobis distances between all possible  
12 finger\*condition\*timepoint combinations for each fold (i.e. run) and averaged them across folds. A  
13 distance greater than 0 reflects dissociable cortical representations while 0 shows no dissociation.  
14 The distance measures between all possible representations were assembled in a representational  
15 dissimilarity matrix (RDM). For visualization, we only extracted distances between the finger  
16 representations during memory vs. no memory for each time point (f1, delay and f2) of the task.  
17

## 18 2.10. STATISTICAL DATA ANALYSIS

19 To detect outliers, we used the robustbase toolbox (Finger, 2010).  $S_n$  identifies an outlier  
20 ( $x_i$ ) if the median distance of  $x_i$  from all other points, was greater than the outlier criterion ( $\lambda=3$ )  
21 times the median absolute distance of every point from every other point:

$$22 \quad (3) \quad \frac{\text{med}_{j \neq i} |x_i - x_j|}{S_n} > \lambda \text{ where } S_n = c_{n_{i=1:n}}^{\text{med}} \left\{ \text{med}_{j \neq 1} |x_i - x_j| \right\},$$

23 where  $c_n$  is a bias correction factor for finite sample sizes (Rousseeuw & Croux, 1993). We detected  
24 no outliers for behavioral data that had to be excluded from any further analysis.

25 Before conducting any repeated measures ANOVA testing, we validated the assumptions for  
26 normality and sphericity using a Shapiro-Wilk and Mauchy test. Effect sizes of different variables  
27 were measured using eta squared. ANOVA analysis was done using the pingouin toolbox (Vallat,

1 2018). P-values were Greenhouse–Geisser corrected if sphericity could not be assumed. T-statistics  
2 were corrected for multiple comparisons using one-step Bonferroni correction.

3 Bayesian analysis was carried out using pingouin toolbox for the main comparisons to  
4 investigate support for the null hypothesis. Following the conventional cut-offs, a BF smaller than  
5 1/3 is considered substantial evidence in favor of the null hypothesis. A BF greater than 3 is  
6 considered substantial evidence, and a BF greater than 10 is considered strong evidence in favor of  
7 the alternative hypothesis. A BF between 1/3 and 3 is considered weak or anecdotal evidence  
8 (Dienes, 2014; Kass & Raftery, 1995).

9

10

11

12

13

14

### 15 3. RESULTS

#### 16 3.1. BEHAVIORAL PERFORMANCE WAS BETTER WITH GREATER FREQUENCY 17 DIFFERENCES

18 A two-way ANOVA showed that behavioral performances differed significantly depending  
19 on the frequency differences between the first and second vibrotactile stimulus ( $F(2, 156) =$   
20  $5.06, p < .001, \eta^2 = 0.06$ ); **Fig. 2A**), but not between stimulated fingers ( $F(1, 156) = .44, p = .51, \eta^2 <$   
21  $0.01$ ). There was no interaction effect;  $F(1, 156) = .88, p = .42, \eta^2 = 0.01$ ). A post hoc test (Tuckey's  
22 HSD) on pairwise comparisons on frequency differences pairs revealed that discrimination accuracy  
23 was significantly different between 2 and 6 Hz differences ( $q = 4.48, p < .01$ ) and showed no  
24 significant difference for the rest of the pairs (4 Hz vs 6 Hz:  $q = 2.67, p = .15$  and 2 Hz vs 4 Hz  $q =$   
25  $1.81, p = .41$ ). We further analyzed whether behavioral performance changed across runs despite  
26 our efforts to re-adjust the detection threshold (**Fig. 2B**) and found only insignificant differences  
27 across runs ( $F(3, 2496) = 2.0, p = .11, \eta^2 < 0.01$ ) and across fingers ( $F(1, 2496) = .48, p = .49, \eta^2 < 0.01$ ),  
28 and no significant interaction effect ( $F(3, 2496) = .47, p = .47, \eta^2 < 0.01$ ).

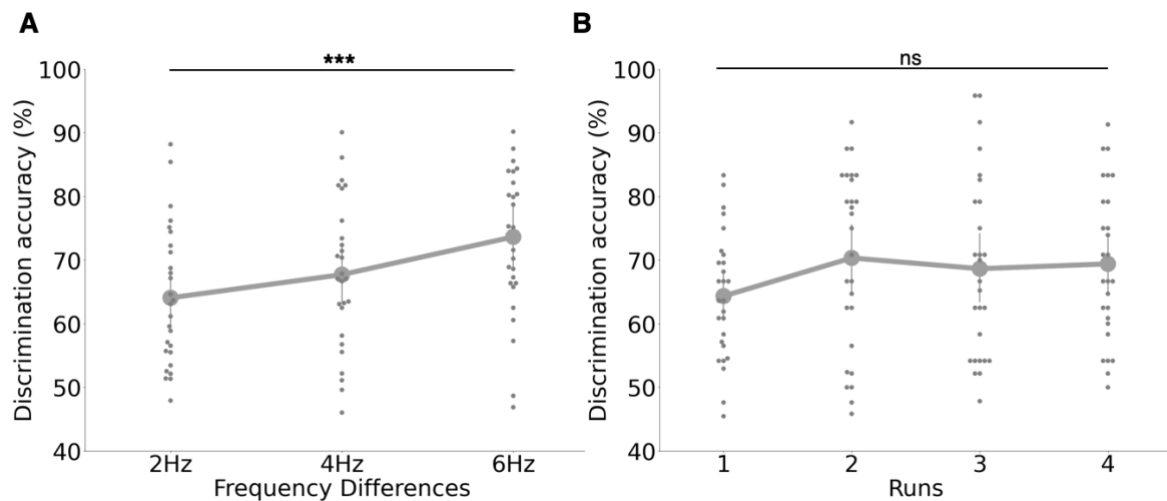

1

2 **Fig. 2. Behavioral performance results.** A. Discrimination accuracy (% of correct answers) improved when  
3 frequency differences were larger. The blue dots reflect the group mean and the blue error bars indicate the  
4 standard deviation of the discrimination accuracy per frequency difference across the whole experiment. B.  
5 Behavioral performance was not significantly different across runs. The blue dots reflect the group mean and  
6 the blue error bars indicate the standard deviation of discrimination accuracies across each run. This  
7 demonstrates that our SDT criterion assured stable discrimination accuracies across runs. Grey dots represent  
8 individual participants' results. \*\*\* =  $p < .001$ ; ns = non-significant.

9

### 10 3.2. VIBROTACTILE WORKING MEMORY RECRUITS A DISTRIBUTED BRAIN 11 NETWORK

12 We first determined brain areas that were more activate during the delay period in the  
13 memory compared to the no memory condition. We found that WM processing involved a  
14 distributed brain network: i.e., bilateral frontal lobe, bilateral (medial/inferior) frontal gyrus (MFG,  
15 IFG), bilateral pre-motor cortex and supplementary motor area (PMC, SMA), contralateral  
16 secondary somatosensory cortex (S2), bilateral inferior parietal lobule (IPL), bilateral superior  
17 parietal lobule (SPL), bilateral supramarginal gyrus (SMG), bilateral caudate, bilateral thalamus,  
18 bilateral nucleus accumbens, and bilateral insula (**Fig. 3A, Table 1 and Appx. A.1**). As in previous  
19 human fMRI studies, this univariate analysis did not reveal significant S1 activity.

20 Furthermore, we contrasted activity levels during vibrotactile stimulation between fingers  
21 (i.e., index>little and little>index finger), and, as expected, observed separated finger  
22 representations in contralateral S1(**Fig. 3B, middle**) with the little finger being represented more

1 medially than the index finger (Besle et al., 2013; Kikkert et al., 2021; Kolasinski et al., 2016;  
2 Martuzzi et al., 2014; Sanchez Panchuelo et al., 2018; Sanders et al., 2019). Finally, we assessed  
3 whether finger-specific activity (e.g. index finger related activity which was greater within the  
4 index finger cluster) was modulated within these finger-specific clusters during memory compared  
5 to no memory trials at different timepoints of the task (f1, delay and f2). Our repeated measures  
6 ANOVA revealed that t-scored beta estimates obtained from index finger cluster did significantly  
7 differ between time points (timepoints main effect:  $F(1, 52) = 52.15$ ,  $p_{corr} < .001$ ,  $\eta^2 = .49$ ), but not  
8 between conditions (conditions main effect:  $F(2, 26) = .14$ ,  $p_{corr} = .5$ ,  $\eta^2 < .05$ ) and. We also found no  
9 significant interaction effect ( $F(2, 52) = 2.04$ ,  $p_{corr} = .14$ ,  $\eta^2 < .05$ ; **Fig. 3B, left**).

10 Extracted t-scored beta estimates from the little finger cluster revealed a time point main  
11 effect ( $F(1, 52) = 38.63$ ,  $p_{corr} < .001$ ,  $\eta^2 = .45$ ) and a condition main effect  $F(1, 26) = 8.75$ ,  $p_{corr} < .01$ ,  
12  $\eta^2 < .05$ ), but no interaction effect ( $F(2, 52) = .54$ ,  $p_{corr} = .58$ ,  $\eta^2 < 0.05$ ; **Fig. 3B, right**).

13  
14

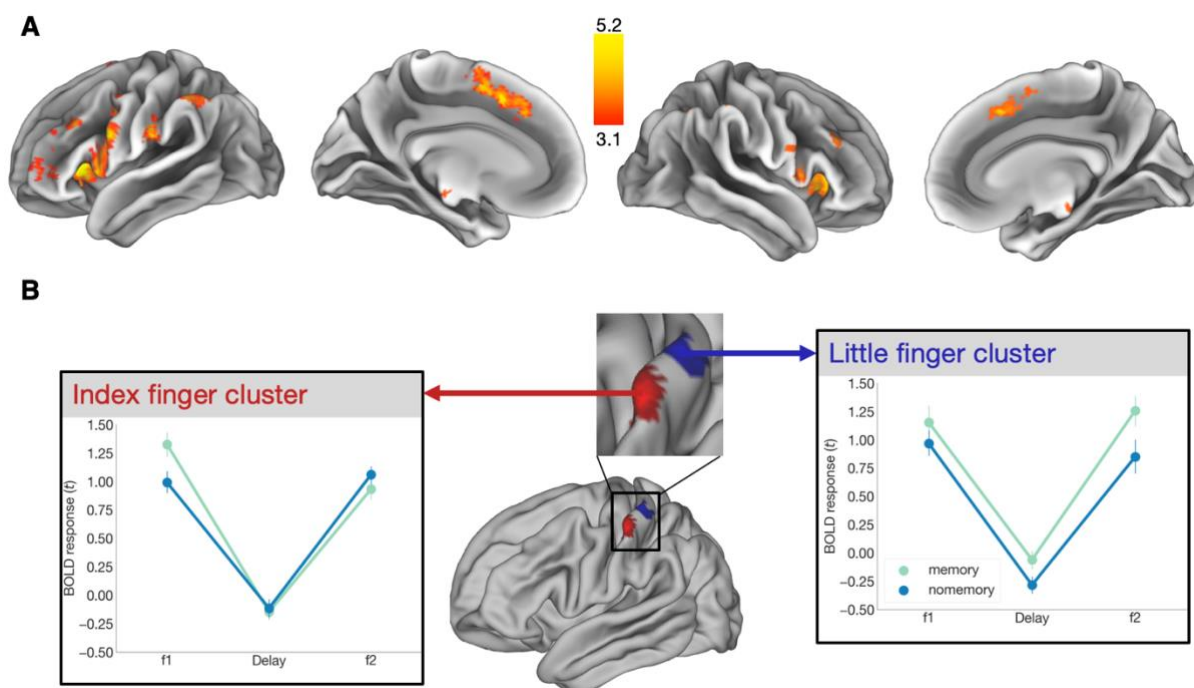

15

16 **Fig. 3. Univariate group results.** A. We determined brain regions that were more activate during the delay  
17 period of the memory compared to the no memory condition. A statistical map ( $Z > 3.1$ ) was obtained by  
18 contrasting delay period activity in memory trials to no memory trials. The map was separately projected  
19 onto a cortical surface contralateral (*top*) and ipsilateral (*bottom*) to the stimulus site. WM related activity  
20 resided in a network of brain regions (for more details, see **Table 1**). B. S1 areas activated during index (red)



1 and little (blue) finger stimulation (*middle*). Clusters activated during index and little finger stimulation Z-  
 2 statistic images were thresholded using clusters determined by  $Z > 3.1$ ,  $p < .05$  family-wise-error-corrected  
 3 (FWE) cluster significance and were projected onto a cortical surface. Finger maps were located in  
 4 contralateral S1. We then extracted the t-scored beta estimates within these finger-specific S1 areas during  
 5 memory and no memory trials at different timepoints (f1, delay and f2) by contrasting cluster-specific finger  
 6 activities (e.g. index finger cluster: index finger memory trials > little finger memory trials; bottom). Point  
 7 plots are centered at the mean and error bars reflect the standard error.

8

| Anatomical region    | Peak MNI Coordinates |     |     | Mean Fisher Z | U-shaped activity |
|----------------------|----------------------|-----|-----|---------------|-------------------|
|                      | X                    | Y   | Z   |               |                   |
| Left Frontal Pole    | -42                  | 52  | 2   | 4.33          | 3.29              |
| Right Frontal Pole   | 40                   | 46  | 32  | 3.86          | 3.16              |
| Left IFG             | -52                  | 16  | 2   | 5.14          | 6.44              |
| Right IFG            | 58                   | 10  | 18  | 4.59          | 5.47              |
| Left MFG             | -44                  | 30  | 34  | 4.45          | -                 |
| Left PMC (+SMA)      | -4                   | 8   | 50  | 5.49          | 5.81              |
| Right PMC (+SMA)     | 8                    | 20  | 46  | 5.78          | 5.66              |
| Left S2              | -56                  | -23 | 20  | 3.25          | 5.75              |
| Right S2             | 54                   | -14 | 16  | -             | 5.14              |
| Left S1              | -54                  | -22 | 46  | -             | 5.63              |
| Right S1             | 56                   | -16 | 40  | -             | 5.75              |
| Left IPS             | -42                  | -52 | 48  | 5.14          |                   |
| Left IPL             | -56                  | -20 | 28  | 4.78          | 5.52              |
| Right IPL            | 46                   | -48 | 52  | 4.86          | 5.67              |
| Left SMG             | -42                  | -46 | 40  | 4.77          | -                 |
| Right SMG            | 51                   | -32 | 46  | 4.16          | -                 |
| Left SPL             | -50                  | -48 | 58  | 4.64          | 4.97              |
| Left Insular cortex  | -30                  | 24  | 6   | 5.61          | 5.41              |
| Right Insular cortex | 36                   | 22  | -2  | 5.41          | 5.32              |
| Left Accumbens       | -12                  | 14  | -6  | 5.27          | -                 |
| Right Accumbens      | 10                   | 12  | -4  | 4.16          | -                 |
| Left Putamen         | -18                  | 6   | -10 | 4.96          | 4.42              |

|                       |     |     |     |      |      |
|-----------------------|-----|-----|-----|------|------|
| <b>Right Putamen</b>  | 20  | 10  | -8  | 4.34 | 3.71 |
| <b>Left Caudate</b>   | -12 | 18  | 0   | 4.80 | 5.45 |
| <b>Right Caudate</b>  | 14  | 18  | 4   | 4.97 | 4.32 |
| <b>Left Thalamus</b>  | -8  | -24 | -16 | 3.86 | 3.81 |
| <b>Right Thalamus</b> | 2   | -20 | -12 | 3.91 | 3.99 |

1 **Table 1.** Identified brain regions in which the local activity during the delay period reflected tactile WM  
2 processing as shown in Fig. 3. In a next step we parametrically modulated the delay activity, assuming a U-  
3 shaped activity during the delay period. For visualization purposes overlap of brain areas was just added the  
4 additional z stats for the parametric modulation results. All z-statistic images were thresholded using clusters  
5 determined by  $Z > 3.1$  and  $p < .05$  family-wise-error-corrected (FWE) cluster significance. Mean Fischer Z  
6 indicates peak z-values. Areas were labeled according to the Juelich Histological Atlas and Harvard-Oxford  
7 (Sub-)cortical Structural Atlas (Eickhoff et al., 2005). MFG= medial frontal gyrus, IFG = inferior frontal gyrus,  
8 PMC = pre-motor cortex, SMA = supplementary motor area, IPL = inferior parietal lobule, SPL = superior  
9 parietal lobule, SMG = supramarginal gyrus.

### 10 3.3. TEMPORAL MODULATION OF DELAY PERIOD ACTIVITY IN CONTRALATERAL 11 S1

12 We then examined how brain activity temporally changed during the delay period. We  
13 parametrically modulated the delay period regressors by the hypothesized U-shaped activity  
14 changes and computed the associated statistical maps. A U-shaped activity modulation was found  
15 in a similar network of brain regions as displayed in **Fig. 4** and **Appx. B.1**. In addition, we also found  
16 significant changes in BOLD signal in bilateral S1 and S2. S1 activity overlapped with the area that  
17 usually represents the hand.

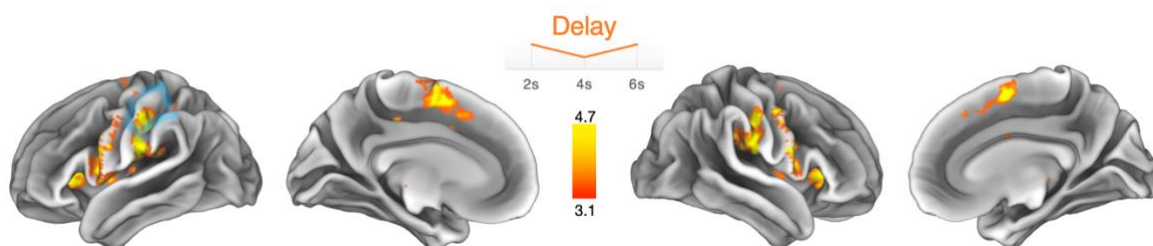

19 **Fig. 4. U-shaped parametric modulation of WM-related activity. A.** Brain regions exhibiting u-shaped  
20 modulated delay activity patterns (see insert at the top reflecting the parametric modulator entered into the  
21 GLM) during the delay period (2-6s). The contrast shows the difference between the memory and no memory

1 condition in the contralateral (*left*) and ipsilateral hemisphere (*right*). The area highlighted in blue represents  
2 the S1 hand area.

### 3 FINGER-SPECIFIC S1 WM REPRESENTATIONS

4 We hypothesized that executing a WM task would modulate finger specific representations  
5 in S1. To test this hypothesis, we used MVPA to decode the stimulated finger (i. e., index versus  
6 little finger) during the first stimulation (f1), during the delay period, and the second stimulation  
7 (f2) separately for memory and no memory trials (**Fig. 5A**). We did this in the contralateral S1 ROI,  
8 which has shown to possess fine-grained finger representations (Besle et al., 2013; Martuzzi et al.,  
9 2014; Sanchez Panchuelo et al., 2018; Sanders et al., 2019), and a control white matter ROI.

10 Our repeated measures ANOVA revealed that classification accuracies obtained from  
11 contralateral S1 hand area significantly differed between time points (f1,delay and f2; time point  
12 main effect:  $F(2, 52) = 156.52$ ,  $p_{corr} < .001$ ,  $\eta^2 = .77$ ) and between memory and no memory trials  
13 (condition main effect:  $F(1, 26) = 48.42$ ,  $p_{corr} < .001$ ,  $\eta^2 < .05$ ). However, we found no interaction  
14 effect (i.e.,  $F(2, 52) = .5$ ,  $p_{corr} = .59$ ,  $\eta^2 < 0.001$ ).

15 Moreover, we showed that differences between memory versus no memory trials reached  
16 significance. This was confirmed by pairwise comparisons ( $t(26) = 6.39$ ,  $p_{corr} < .001$ ;  $BF_{10} = 1.95e^4$   
17 with the Bayes factor (BF) showing extreme evidence in favor of the WM-related modulation.

18 Permutation tests allowed us to obtain approximated chance levels. We observed that  
19 classification accuracies were significantly greater than this chance level for f1 and f2, irrespective  
20 of whether it was a memory or no memory trial ( $t(25,25) \geq 13.24$ ,  $p < .001$ ). During the delay  
21 period, however, classification exceeded the chance level only for memory trials ( $t(26) = 4.55$ ,  $p <$   
22  $.001$ ) but not for no memory trials ( $t(26) = 1.5$ ,  $p = .15$ ).

23 Furthermore, we also investigated the representational geometry of memorized tactile  
24 stimuli (**Fig. 5B**). We hypothesized that executing a WM task would also modulate the finger  
25 representational geometry in S1. Our repeated measures ANOVA revealed that the cross-validated  
26 Mahalanobis (Crossnobis) distances obtained from contralateral S1 hand area significantly differed  
27 between time points (f1,delay and f2; time point main effect:  $F(2, 52) = 151.21$ ,  $p_{corr} < .001$ ,  $\eta^2 = .73$ )  
28 and between memory and no memory trials (condition main effect:  $F(1, 26) = 39.81$ ,  $p_{corr} < .001$ ,  $\eta^2$   
29  $= .06$ ). We also found an interaction effect (i.e.,  $F(2, 52) = 28.65$ ,  $p_{corr} < .001$ ,  $\eta^2 < 0.05$ ). We again  
30 could show that geometrical differences of finger representations between memory versus no  
31 memory trials reached significance when independently tested for each of the three time points

1 and, particularly, for the delay period (i.e. in the absence of any tactile stimulation). This was  
2 confirmed by pairwise comparisons (f1 memory vs. f1 no memory:  $t(26) = 4.09$ ,  $p_{corr} < .01$ ;  $BF_{10} =$   
3  $81.73$ , Delay memory vs. delay no memory:  $t(26) = 2.9$ ,  $p_{corr} < .05$ ;  $BF_{10} = 5.96$ , f2 memory vs. f2  
4 no memory:  $t(26) = 7.4$ ,  $p_{corr} < .001$ ;  $BF_{10} > 100$ , with the Bayes factor (BF) showing substantial  
5 evidence in favor of the null hypothesis.

6 We also explored further ROIs located on superior parietal lobe (SPL; **Fig. 5C**) and inferior  
7 frontal gyrus (IFG; **Fig. 5D**) that have been implicated to be involved in vibrotactile WM (Schmidt  
8 et al., 2017, 2021; Schmidt & Blankenburg, 2018). ROIs were based on clusters obtained in  
9 univariate analysis (DelayMemory > DelaynoMemory). We found no significant differences in  
10 classification accuracies based on activity patterns within contralateral IFG (time point main effect,  
11  $F(2, 52) = 0.93$ ,  $p_{corr} = 0.4$ ,  $\eta^2 < .05$ ; condition main effect,  $F(1, 26) = 0.38$ ,  $p_{corr} = 0.55$ ,  $\eta^2 < .05$ ) and  
12 time point x condition interaction effect  $F(2, 52) = 1.28$ ,  $p_{corr} = .28$ ,  $\eta^2 < .05$ ) as well as within  
13 contralateral SPL (time point main effect,  $F(2, 52) = .75$ ,  $p_{corr} = .46$ ,  $\eta^2 < .05$ ; condition main effect,  
14  $F(1, 26) = .85$ ,  $p_{corr} = .37$ ,  $\eta^2 < .05$  and time point x condition interaction effect  $F(2, 52) = .68$ ,  $p_{corr} =$   
15  $.51$ ,  $\eta^2 < .05$ ). Together, these results suggest that during a vibrotactile WM task finger  
16 representations are likely modulated in S1 and not in other areas of the WM network, even in the  
17 absence of any tactile stimulation.

18

19

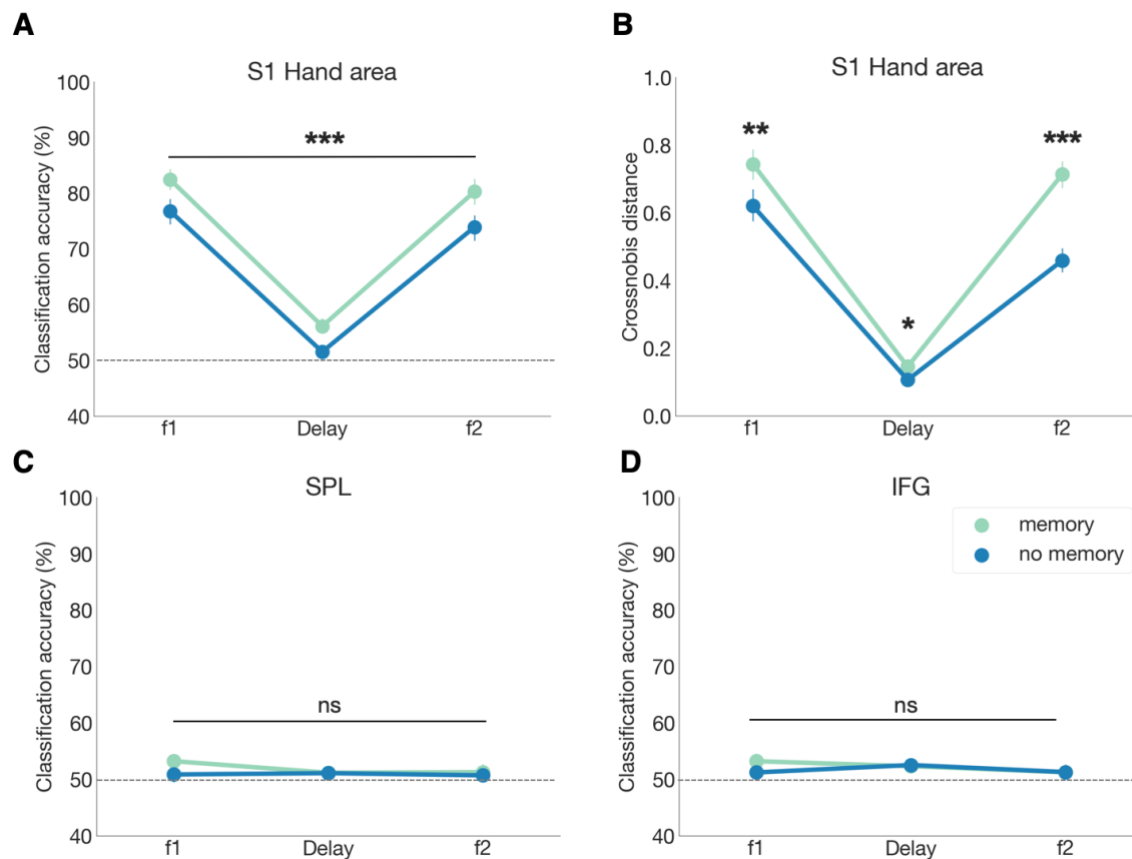

1  
 2 **Fig. 5. Multivariate results on somatotopic modulations.** We investigated whether activity patterns within a  
 3 ROI with fine-grained finger somatotopy became more distinct at different timepoints (f1, delay and f2)  
 4 during memory trials compared to no memory trials. **A.** Classification accuracies (index vs. little finger) based  
 5 on activity patterns in hand area within contralateral S1. **B.** Cross-validated Mahalanobis (Crossnobis)  
 6 distances between fingers x condition in the same ROI. **C,D.** Further explorative analysis of ROIs that  
 7 previously were indicated to be involved in vibrotactile WM, but where no fine-grained somatotopy is  
 8 assumed. The point plots are centered at the mean and error bars reflect the standard error. Grey dotted lines  
 9 reflect the theoretical chance level. If interaction effects were significant, pairwise comparisons results for  
 10 comparing memory vs. no memory conditions separately for each time point are indicated by \*  $p < .05$ , \*\*  $p <$   
 11  $.01$  \*\*\*  $p < .001$ . S1 = primary somatosensory cortex, IFG = inferior frontal gyrus, SPL = superior parietal lobule.

12

#### 13 4. DISCUSSION

14 Tactile decision making based on mentally represented information is an essential part of higher  
 15 cognitive processes. In the absence of sensory stimuli, decisions are made with information stored  
 16 in WM (Christophel et al., 2017). A more profound insight into how the brain stores information  
 17 in WM is essential to understand human cognition. This includes not only the involvement of

1 sensory regions in WM but also how their topographic organization might be modulated. In the  
2 present study, we demonstrated that finger-specific, somatosensory information represented in S1  
3 is modulated by cognitive processes relevant for performing a vibrotactile frequency  
4 discrimination task. Our main finding was that S1 activity during the delay period (i.e. in the  
5 absence of any tactile stimulation) contained information on which finger received somatosensory  
6 input even though the average BOLD activity in S1 did not differ between conditions.  
7 Importantly, when participants received the same stimuli in a no memory condition, classification  
8 accuracies and representational dissimilarities were significantly lower indicating that our main  
9 finding was specific to the cognitive task.

10 We propose that keeping task-relevant tactile information in WM modulated finger  
11 representations in S1 due to top-down control mechanisms that sharpens tuning curves of  
12 neurons in S1 and might be associated with attentional control.

#### 13 4.1. SOMATOTOPIC MODULATION IN S1 IS MAINTAINED DURING WM DELAY PERIOD

14 When exposed to a stimulus, stimulus-selective neurons are activated which is can be quantified  
15 as a tuning curve. Previously, specific neurons have shown ‘tuned’ responses to different features  
16 of the stimulus, e.g. stimulus location or stimulus orientation (Campbell et al., 1968; Henry et al.,  
17 1974; Scobey & Gabor, 1989). For instance, responses of neuron populations in primary visual  
18 cortex (V1) can be modulated by changes of stimulus orientation (Hubel & Wiesel, 1968). The  
19 product of multiple tuning curves can be defined as the neural population code (Ben-Yishai et al.,  
20 1995; Georgopoulos et al., 1986). A linear decoder has the ability to capture the information kept  
21 in the neural population code (Kriegeskorte & Wei, 2021). Similarly, neural tuning also  
22 determines the representational geometry in the multivariate response space and these changes in  
23 geometry can be detected by RSA (Kriegeskorte & Wei, 2021).

24 Even in the absence of sensory input, the somatosensory cortex in non-human primates  
25 has shown to possess neurons whose tuning curves properties depend on the frequency of the a  
26 priori presented vibrotactile stimulus (Romo & Salinas, 2003). Neuroimaging studies in humans  
27 using MVPA have further revealed that tactospatial information is retained during the delay  
28 period by a neural population code in S1, SPL, PMC and posterior parietal cortex (PPC) while  
29 preserved frequency information is reflected by activity patterns in dorsal PMC, SMA and IFG  
30 (Schmidt et al., 2017; Schmidt & Blankenburg, 2018). Note that we did not attempt to directly  
31 decode task-relevant features of the tactile WM content. However, it is likely that immediate

1 modulation of the somatotopic map in S1 is inherent to performing the WM tasks since it involves  
2 encoding stimulus location information. This could explain why previously such modulation was  
3 also observed during (i) attempted finger movements that activated S1 in an effector specific  
4 manner even in the absence of any motor activity and self-generated sensory feedback (Kikkert et  
5 al., 2016, 2021; Wesselink et al., 2019), (ii) viewing touches (Kuehn et al., 2018), actively  
6 imagining touch (Schmidt & Blankenburg, 2019), (iii) or attending to individual finger  
7 stimulation (Puckett et al., 2017). Likewise, keeping tactile stimuli in WM (as in our case) appears  
8 to be sufficient to generate a more dissociable somatotopic map in S1, a process that might aid  
9 tactile decision making. The advantage of the topographic arrangement in S1 might be a reduction  
10 in time of information transmission and thus metabolic expensive connections (for review, (Manni  
11 & Petrosini, 2004). When afferent input from adjacent body parts enters the brain, their cortical  
12 representations might facilitate discrimination between sensory information from different spatial  
13 locations.

14 Even though our results did not allow to draw any conclusions on its task-relevance, there  
15 exists evidence that tactile decision making depends on neural activity in S1. Two transcranial  
16 magnetic stimulation (TMS) studies in humans found impaired behavioral vibrotactile frequency  
17 discrimination performance when TMS pulses were applied to either contralateral S1 during the  
18 beginning (Harris et al., 2002) or to ipsilateral S1 at the end of the delay period (Zhao & Ku,  
19 2018). This suggests that when performing a vibrotactile WM task neural activity in S1 appears to  
20 be task-relevant and not only restricted to the contralateral hemisphere.

21 It is uncertain which specific cognitive mechanism might have driven the observed  
22 modulation. A discrimination task usually requires enhancement of neural activity to relevant  
23 stimuli and suppress activity to irrelevant stimuli. Such amplification of relevant information has  
24 been conceptualized as generalized models of attention (for review, Burton & Sinclair, 2000).  
25 Attention has been suggested as an integral part of performing WM tasks (Cowan et al., 2013; Logie  
26 & Cowan, 2015; Schmidt & Blankenburg, 2018, 2019) as it filters information by sensory modality  
27 or by body location (Gomez-Ramirez et al., 2011) and, thereby, attention regulates what will be  
28 cortically represented and what will not (Desimone & Duncan, 1995). Furthermore, it has been  
29 shown that volitionally directing attention towards a spot on the body surface which was tacitly  
30 stimulated increases BOLD responses in S1 (Nelson et al., 2004; Puckett et al., 2017; Sterr et al.,  
31 2007). Even the expectation over being stimulated on a specific finger was sufficient to modulate  
32 neural activity in S1 in a somatotopic manner (Roland, 1981, Drevet et al. 1995). Both our univariate

1 and multivariate results support this notion. During both time points of stimulation (f1 and f2) we  
2 observed significantly greater finger-specific BOLD responses in S1 and obtained higher  
3 classification accuracies and crossnobis distances for the memory than the no memory condition.

4         There is accumulating evidence that attention modulates tuning curves in the specific  
5 sensory modality (Bisley, 2011; McAdams & Maunsell, 1999; Reynolds et al., 2000). By sharpening  
6 tuning curves attention contributes to increased discrimination performance ((Bartsch et al.,  
7 2017), but see also Seriès et al., 2004). According to the sharpening hypothesis, predicted or  
8 attended stimuli lead to suppressed neural activity, while increasing the information content  
9 (Murray & Wojciulik, 2004). This might explain why we observed no difference in BOLD  
10 responses in S1 during the delay period of memory trials compared to no memory trials, while we  
11 found significantly higher classification accuracies and representational dissimilarities between  
12 fingers that indicated the presence of greater amounts of information.

13         In summary, our findings are in line with the idea that greater representational  
14 dissimilarities during WM might reflect attentional top-down control which optimally tunes  
15 somatotopic finger representation while vibrotactile stimulation is received (i.e. during f1 and f2)  
16 but, more importantly, also during the delay period.

17

#### 18 4.2. TEMPORAL MODULATION OF BRAIN ACTIVITY DURING THE WM DELAY PERIOD

19         In line with previous research (Pasternak & Greenlee, 2005; Preuschhof et al., 2006), we  
20 identified a widespread parieto-fronto-insular network which is typically involved in tactile WM.  
21 We could show that fronto-partial areas, insular cortices, subcortical regions (i.e. caudate and  
22 thalamus), S1 and S2 exhibited a U-shaped activity profile across the delay period, which might  
23 provide a glimpse into the temporal modulation of WM related brain activity (Cohen et al. 1997).  
24 Neurophysiological models of WM have proposed that vibrotactile information is processed in S1,  
25 relayed to S2 (Kalberlah et al., 2013), which possesses a reciprocal connection with S1 and  
26 disseminates information via insular projections to frontal and parietal regions (Wang et al., 2013).  
27 Task-relevant modulation could occur through prefrontal cortex (PFC) by gating the flow of  
28 vibrotactile information to S1. Indeed, the prefrontal-thalamic inhibitory system could play a key  
29 role in boosting relevant stimulus information while reducing irrelevant ones (Staines et al., 2002).  
30 It is likely that the final increase in delay activity might be driven by anticipation of increasing  
31 attentional demands, although we jittered the length of the delay period to prevent for anticipatory



1 activity (Rose et al., 2016). Therefore, it is very likely that attentional mechanisms are driving our  
2 results. However, as mentioned before, WM and attention are thought to be closely intertwined  
3 (LaBar et al., 1999; Naghavi & Nyberg, 2005) and our set-up did not allow to disentangle these  
4 aspects.

5

#### 6 4.2. INTERPRETATIONAL ISSUES

7 Our multivariate analysis results suggest that a WM task modulates representational tuning  
8 in S1. However, our memory delay period was relatively short (6-8s) compared to other fMRI  
9 studies investigating vibrotactile WM that often employ delays of 12s to avoid any carry-over  
10 effects (Schmidt & Blankenburg, 2018; Wu et al., 2018). Nonetheless, it seems unlikely that the  
11 WM related somatotopic activity patterns observed in S1 were merely a residue of stimulus evoked  
12 activity due to the sluggishness of the BOLD response since we directly compared the memory and  
13 no memory condition. If we merely decoded a residue of the tactile stimulation per se, then we  
14 would expect similar decoding results for both conditions during the delay period. Indeed, finger  
15 stimulations were identical for the memory and no memory conditions. The only difference  
16 between these conditions was the cognitive strategy participants employed. While classification  
17 accuracies and Crossnobis distances were significantly higher during the memory condition, this  
18 was not the case during the no memory condition. Finally, the low VIF of the regressors suggested  
19 that activity related to stimulus perception and WM storage could be disentangled by our model.

20

#### 21 5. CONCLUSIONS

22 Our results extend previous findings on the involvement of S1 in vibrotactile frequency  
23 discrimination. We provide new evidence for the importance of somatotopy during vibrotactile  
24 WM, particularly during the delay period, i.e. in the absence of any stimulation. This is remarkable,  
25 since the cortical representation of the stimulus location was not essential for solving the WM task  
26 suggesting that some aspects of the tactile WM content are represented in a somatotopic fashion.  
27 We speculate that finger representations in S1 are modulated during WM through top-down  
28 attentional mechanisms which adds to a broader understanding of human cognition.

#### 29 6. ACKNOWLEDGMENTS

1 We thank Christian Ruff for stimulating discussions. We also want to thank Daniel Woolley and  
2 Roger Lüchinger for technical support as well as Alain Plüss and Bianca Badii for help with data  
3 collection.

4

## 5 7. FUNDING

6 This work was supported by the Swiss National Science Foundation (320030\_175616) and by the  
7 National Research Foundation, Prime Minister's Office, Singapore under its Campus for Research  
8 Excellence and Technological Enterprise (CREATE) program (FHT). SK was supported by the ETH  
9 Zürich Postdoctoral Fellowship Program.

10

## 11 8. SUPPLEMENTARY MATERIAL

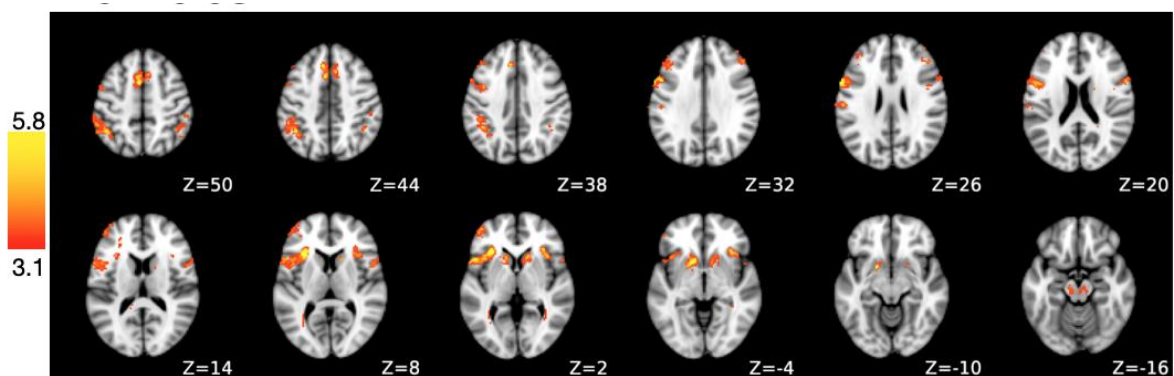

12

13 **Appx. A.1. Slice view of univariate group results.** We identified brain regions that were more activate during  
14 the delay period of the memory compared to the no memory condition. A statistical map ( $Z > 3.1$ ) was  
15 obtained by contrasting modulated delay period activity in memory trials to no memory trials.

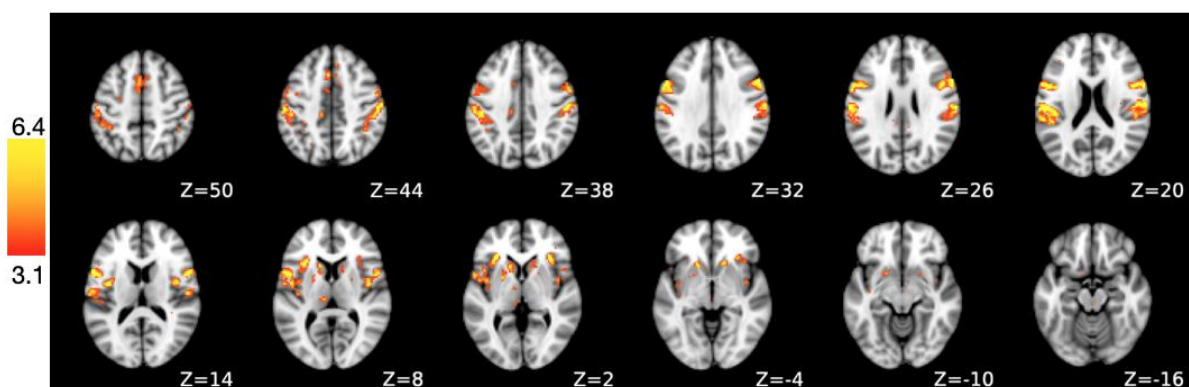

16

17 **Appx. B.2. Slice view of parametric modulation results.** We identified brain regions exhibiting u-shaped  
18 modulated delay activity patterns during the delay period (2-6s). A statistical map ( $Z > 3.1$ ) was obtained by  
19 contrasting delay period activity in memory trials to no memory trials.

20

1  
2  
3  
4  
5  
6  
7  
8  
9  
10  
11  
12  
13  
14  
15  
16  
17  
18  
19  
20  
21  
22  
23  
24  
25  
26  
27  
28  
29  
30  
31  
32  
33  
34  
35  
36  
37  
38  
39  
40  
41  
42  
43  
44

## REFERENCES

- Abraham, A., Pedregosa, F., Eickenberg, M., Gervais, P., Mueller, A., Kossaifi, J., Gramfort, A., Thirion, B., & Varoquaux, G. (2014). Machine learning for neuroimaging with scikit-learn. *Frontiers in Neuroinformatics*, *8*. <https://doi.org/10.3389/fninf.2014.00014>
- Ariani, P., Pruszynski, J. A., & Diedrichsen, J. (2021). Motor planning brings human primary somatosensory cortex into action-specific preparatory states. *BioRxiv*.
- Bartsch, M. v., Loewe, K., Merkel, C., Heinze, H.-J., Schoenfeld, M. A., Tsotsos, J. K., & Hopf, J.-M. (2017). Attention to Color Sharpens Neural Population Tuning via Feedback Processing in the Human Visual Cortex Hierarchy. *The Journal of Neuroscience*, *37*(43). <https://doi.org/10.1523/JNEUROSCI.0666-17.2017>
- Ben-Yishai, R., Bar-Or, R. L., & Sompolinsky, H. (1995). Theory of orientation tuning in visual cortex. *Proceedings of the National Academy of Sciences*, *92*(9). <https://doi.org/10.1073/pnas.92.9.3844>
- Besle, J., Sánchez-Panchuelo, R.-M., Bowtell, R., Francis, S., & Schluppeck, D. (2013). Single-subject fMRI mapping at 7 T of the representation of fingertips in S1: a comparison of event-related and phase-encoding designs. *Journal of Neurophysiology*, *109*(9). <https://doi.org/10.1152/jn.00499.2012>
- Bisley, J. W. (2011). The neural basis of visual attention. *The Journal of Physiology*, *589*(1). <https://doi.org/10.1113/jphysiol.2010.192666>
- Burton, H., & Sinclair, R. J. (2000). Attending to and Remembering Tactile Stimuli. *Journal of Clinical Neurophysiology*, *17*(6). <https://doi.org/10.1097/00004691-200011000-00004>
- Campbell, F. W., Cleland, B. G., Cooper, G. F., & Enroth-Cugell, C. (1968). The angular selectivity of visual cortical cells to moving gratings. *The Journal of Physiology*, *198*(1). <https://doi.org/10.1113/jphysiol.1968.sp008604>
- Christophel, T. B., Klink, P. C., Spitzer, B., Roelfsema, P. R., & Haynes, J.-D. (2017). The Distributed Nature of Working Memory. *Trends in Cognitive Sciences*, *21*(2). <https://doi.org/10.1016/j.tics.2016.12.007>
- Cowan, N., Blume, C. L., & Saults, J. S. (2013). Attention to attributes and objects in working memory. *Journal of Experimental Psychology: Learning, Memory, and Cognition*, *39*(3). <https://doi.org/10.1037/a0029687>
- Cunningham, D. A., Machado, A., Yue, G. H., Carey, J. R., & Plow, E. B. (2013). Functional somatotopy revealed across multiple cortical regions using a model of complex motor task. *Brain Research*, *1531*. <https://doi.org/10.1016/j.brainres.2013.07.050>
- Desimone, R., & Duncan, J. (1995). Neural Mechanisms of Selective Visual Attention. *Annual Review of Neuroscience*, *18*(1). <https://doi.org/10.1146/annurev.ne.18.030195.001205>
- D'Esposito, M., & Postle, B. R. (2015). The Cognitive Neuroscience of Working Memory. *Annual Review of Psychology*, *66*(1). <https://doi.org/10.1146/annurev-psych-010814-015031>

- 1 Detorakis, G. Is., & Rougier, N. P. (2014). Structure of receptive fields in a computational  
2 model of area 3b of primary sensory cortex. *Frontiers in Computational Neuroscience*,  
3 8. <https://doi.org/10.3389/fncom.2014.00076>
- 4 Diedrichsen, J., Wiestler, T., & Ejaz, N. (2013). A multivariate method to determine the  
5 dimensionality of neural representation from population activity. *NeuroImage*, 76.  
6 <https://doi.org/10.1016/j.neuroimage.2013.02.062>
- 7 Dienes, Z. (2014). Using Bayes to get the most out of non-significant results. *Frontiers in*  
8 *Psychology*, 5. <https://doi.org/10.3389/fpsyg.2014.00781>
- 9 Eickhoff, S. B., Stephan, K. E., Mohlberg, H., Grefkes, C., Fink, G. R., Amunts, K., & Zilles,  
10 K. (2005). A new SPM toolbox for combining probabilistic cytoarchitectonic maps and  
11 functional imaging data. *NeuroImage*, 25(4).  
12 <https://doi.org/10.1016/j.neuroimage.2004.12.034>
- 13 Ejaz, N., Hamada, M., & Diedrichsen, J. (2015). Hand use predicts the structure of  
14 representations in sensorimotor cortex. *Nature Neuroscience*, 18(7).  
15 <https://doi.org/10.1038/nn.4038>
- 16 Ester, E. F., Serences, J. T., & Awh, E. (2009). Spatially Global Representations in Human  
17 Primary Visual Cortex during Working Memory Maintenance. *Journal of*  
18 *Neuroscience*, 29(48). <https://doi.org/10.1523/JNEUROSCI.4388-09.2009>
- 19 Finger, R. (2010). Review of 'Robustbase' software for R. *Journal of Applied Econometrics*,  
20 25(7). <https://doi.org/10.1002/jae.1194>
- 21 Fischl, B. (2012). FreeSurfer. *NeuroImage*, 62(2).  
22 <https://doi.org/10.1016/j.neuroimage.2012.01.021>
- 23 Fischl, B., Sereno, M. I., & Dale, A. M. (1999). Cortical Surface-Based Analysis. *NeuroImage*,  
24 9(2). <https://doi.org/10.1006/nimg.1998.0396>
- 25 Georgopoulos, A. P., Schwartz, A. B., & Kettner, R. E. (1986). Neuronal Population Coding  
26 of Movement Direction. *Science*, 233(4771). <https://doi.org/10.1126/science.3749885>
- 27 Gomez-Ramirez, M., Kelly, S. P., Molholm, S., Sehatpour, P., Schwartz, T. H., & Foxe, J. J.  
28 (2011). Oscillatory Sensory Selection Mechanisms during Intersensory Attention to  
29 Rhythmic Auditory and Visual Inputs: A Human Electroencephalographic Investigation.  
30 *Journal of Neuroscience*, 31(50). <https://doi.org/10.1523/JNEUROSCI.2164-11.2011>
- 31 Greve, D. N., & Fischl, B. (2009). Accurate and robust brain image alignment using  
32 boundary-based registration. *NeuroImage*, 48(1), 63–72.  
33 <https://doi.org/10.1016/j.neuroimage.2009.06.060>
- 34 Guan, C., Aflalo, T., Zhang, C. Y., Rosario, E. R., Pouratian, N., & Andersen, R. A. (2021).  
35 Preserved motor representations after paralysis. *BioRxiv*.
- 36 Harris, J. A., Arabzadeh, E., Fairhall, A. L., Benito, C., & Diamond, M. E. (2006). Factors  
37 Affecting Frequency Discrimination of Vibrotactile Stimuli: Implications for Cortical  
38 Encoding. *PLoS ONE*, 1(1). <https://doi.org/10.1371/journal.pone.0000100>
- 39 Harris, J. A., Miniussi, C., Harris, I. M., & Diamond, M. E. (2002). Transient Storage of a  
40 Tactile Memory Trace in Primary Somatosensory Cortex. *The Journal of Neuroscience*,  
41 22(19). <https://doi.org/10.1523/JNEUROSCI.22-19-08720.2002>
- 42 Henry, G. H., Dreher, B., & Bishop, P. O. (1974). Orientation specificity of cells in cat striate  
43 cortex. *Journal of Neurophysiology*, 37(6). <https://doi.org/10.1152/jn.1974.37.6.1394>
- 44 Huang, Y., Wang, J. Y., Wei, X. M., & Hu, B. (2014). Bioinfo-Kit: A Sharing Software Tool  
45 for Bioinformatics. *Applied Mechanics and Materials*, 472.  
46 <https://doi.org/10.4028/www.scientific.net/AMM.472.466>

- 1 Hubel, D. H., & Wiesel, T. N. (1968). Receptive fields and functional architecture of monkey  
2 striate cortex. *The Journal of Physiology*, *195*(1).  
3 <https://doi.org/10.1113/jphysiol.1968.sp008455>
- 4 Jenkinson, M. (2002). Improved Optimization for the Robust and Accurate Linear  
5 Registration and Motion Correction of Brain Images. *NeuroImage*, *17*(2).  
6 [https://doi.org/10.1016/S1053-8119\(02\)91132-8](https://doi.org/10.1016/S1053-8119(02)91132-8)
- 7 Jenkinson, M., & Smith, S. M. (2001). A global optimization method for robust affine  
8 registration of brain images. *Medical Imaging Analysis*, *5*, 143–156.
- 9 Johnston, R., Jones, K., & Manley, D. (2018). Confounding and collinearity in regression  
10 analysis: a cautionary tale and an alternative procedure, illustrated by studies of British  
11 voting behaviour. *Quality & Quantity*, *52*(4). [https://doi.org/10.1007/s11135-017-0584-](https://doi.org/10.1007/s11135-017-0584-6)  
12 [6](https://doi.org/10.1007/s11135-017-0584-6)
- 13 Kaas, J. H. (1993). The functional organization of somatosensory cortex in primates. *Annals*  
14 *of Anatomy - Anatomischer Anzeiger*, *175*(6). [https://doi.org/10.1016/S0940-](https://doi.org/10.1016/S0940-9602(11)80212-8)  
15 [9602\(11\)80212-8](https://doi.org/10.1016/S0940-9602(11)80212-8)
- 16 Kaas, J. H. (1997). Topographic Maps are Fundamental to Sensory Processing. *Brain Research*  
17 *Bulletin*, *44*(2). [https://doi.org/10.1016/S0361-9230\(97\)00094-4](https://doi.org/10.1016/S0361-9230(97)00094-4)
- 18 Kalberlah, C., Villringer, A., & Pleger, B. (2013). Dynamic causal modeling suggests serial  
19 processing of tactile vibratory stimuli in the human somatosensory cortex—An fMRI  
20 study. *NeuroImage*, *74*. <https://doi.org/10.1016/j.neuroimage.2013.02.018>
- 21 Kass, R. E., & Raftery, A. E. (1995). Bayes Factors. *Journal of the American Statistical*  
22 *Association*, *90*(430). <https://doi.org/10.2307/2291091>
- 23 Katus, T., Grubert, A., & Eimer, M. (2015). Electrophysiological Evidence for a Sensory  
24 Recruitment Model of Somatosensory Working Memory. *Cerebral Cortex*, *25*(12).  
25 <https://doi.org/10.1093/cercor/bhu153>
- 26 Kikkert, S., Kolasinski, J., Jbabdi, S., Tracey, I., Beckmann, C. F., Johansen-Berg, H., &  
27 Makin, T. R. (2016). Revealing the neural fingerprints of a missing hand. *ELife*, *5*.  
28 <https://doi.org/10.7554/eLife.15292>
- 29 Kikkert, S., Pfyffer, D., Verling, M., Freund, P., & Wenderoth, N. (2021). Finger somatotopy  
30 is preserved after tetraplegia but deteriorates over time. *ELife*, *10*.  
31 <https://doi.org/10.7554/eLife.67713>
- 32 Kolasinski, J., Makin, T. R., Jbabdi, S., Clare, S., Stagg, C. J., & Johansen-Berg, H. (2016).  
33 Investigating the Stability of Fine-Grain Digit Somatotopy in Individual Human  
34 Participants. *Journal of Neuroscience*, *36*(4). [https://doi.org/10.1523/JNEUROSCI.1742-](https://doi.org/10.1523/JNEUROSCI.1742-15.2016)  
35 [15.2016](https://doi.org/10.1523/JNEUROSCI.1742-15.2016)
- 36 Kriegeskorte, N., & Wei, X.-X. (2021). Neural tuning and representational geometry. *Nature*  
37 *Reviews Neuroscience*, *22*(11). <https://doi.org/10.1038/s41583-021-00502-3>
- 38 Kuehn, E., Haggard, P., Villringer, A., Pleger, B., & Sereno, M. I. (2018). Visually-Driven  
39 Maps in Area 3b. *The Journal of Neuroscience*, *38*(5).  
40 <https://doi.org/10.1523/JNEUROSCI.0491-17.2017>
- 41 LaBar, K. S., Gitelman, D. R., Parrish, T. B., & Mesulam, M.-M. (1999). Neuroanatomic  
42 Overlap of Working Memory and Spatial Attention Networks: A Functional MRI  
43 Comparison within Subjects. *NeuroImage*, *10*(6).  
44 <https://doi.org/10.1006/nimg.1999.0503>
- 45 Logie, R. H., & Cowan, N. (2015). Perspectives on working memory: introduction to the  
46 special issue. *Memory & Cognition*, *43*(3). <https://doi.org/10.3758/s13421-015-0510-x>
- 47 Manni, E., & Petrosini, L. (2004). A century of cerebellar somatotopy: a debated  
48 representation. *Nature Reviews Neuroscience*, *5*(3). <https://doi.org/10.1038/nrn1347>

- 1 Marcus, D. S., Harwell, J., Olsen, T., Hodge, M., Glasser, M. F., Prior, F., Jenkinson, M.,  
2 Laumann, T., Curtiss, S. W., & van Essen, D. C. (2011). Informatics and Data Mining  
3 Tools and Strategies for the Human Connectome Project. *Frontiers in*  
4 *Neuroinformatics*, 5. <https://doi.org/10.3389/fninf.2011.00004>
- 5 Martuzzi, R., van der Zwaag, W., Farthouat, J., Gruetter, R., & Blanke, O. (2014). Human  
6 finger somatotopy in areas 3b, 1, and 2: A 7T fMRI study using a natural stimulus.  
7 *Human Brain Mapping*, 35(1). <https://doi.org/10.1002/hbm.22172>
- 8 McAdams, C. J., & Maunsell, J. H. R. (1999). Effects of Attention on Orientation-Tuning  
9 Functions of Single Neurons in Macaque Cortical Area V4. *The Journal of*  
10 *Neuroscience*, 19(1). <https://doi.org/10.1523/JNEUROSCI.19-01-00431.1999>
- 11 Mountcastle, V. B., Talbot, W. H., Darian-Smith, I., & Kornhuber, H. H. (1967). Neural Basis  
12 of the Sense of Flutter-Vibration. *Science*, 155(3762).  
13 <https://doi.org/10.1126/science.155.3762.597>
- 14 Murray, S. O., & Wojciulik, E. (2004). Attention increases neural selectivity in the human  
15 lateral occipital complex. *Nature Neuroscience*, 7(1). <https://doi.org/10.1038/nn1161>
- 16 Naghavi, H. R., & Nyberg, L. (2005). Common fronto-parietal activity in attention, memory,  
17 and consciousness: Shared demands on integration? *Consciousness and Cognition*,  
18 14(2). <https://doi.org/10.1016/j.concog.2004.10.003>
- 19 Nelson, A. J., Staines, W. R., Graham, S. J., & McIlroy, W. E. (2004). Activation in SI and SII;  
20 the influence of vibrotactile amplitude during passive and task-relevant stimulation.  
21 *Cognitive Brain Research*, 19(2). <https://doi.org/10.1016/j.cogbrainres.2003.11.013>
- 22 Ojala, M., & Garriga, G. C. (2009, December). Permutation Tests for Studying Classifier  
23 Performance. *2009 Ninth IEEE International Conference on Data Mining*.  
24 <https://doi.org/10.1109/ICDM.2009.108>
- 25 Pasternak, T., & Greenlee, M. W. (2005). Working memory in primate sensory systems.  
26 *Nature Reviews Neuroscience*, 6(2). <https://doi.org/10.1038/nrn1603>
- 27 Pedregosa, F. and V. G. and G. A. and M. V. and T. B. and G. O. and B. M. and P. P. and W.  
28 R. and D. V. and V. J. and P. A. and C. D. and B. M. and P. M. and D. E. (2011). Scikit-  
29 learn: Machine Learning in Python. *Journal of Machine Learning Research*, 12(85),  
30 2825–2830.
- 31 Peirce, J., Gray, J. R., Simpson, S., MacAskill, M., Höchenberger, R., Sogo, H., Kastman, E., &  
32 Lindeløv, J. K. (2019). PsychoPy2: Experiments in behavior made easy. *Behavior*  
33 *Research Methods*, 51(1). <https://doi.org/10.3758/s13428-018-01193-y>
- 34 Penfield, W., & Boldrey, E. (1937). Somatic motor and sensory representation in the cerebral  
35 cortex of man as studied by electrical stimulation. *Brain*, 60(4).  
36 <https://doi.org/10.1093/brain/60.4.389>
- 37 Pleger, B., Blankenburg, F., Ruff, C. C., Driver, J., & Dolan, R. J. (2008). Reward Facilitates  
38 Tactile Judgments and Modulates Hemodynamic Responses in Human Primary  
39 Somatosensory Cortex. *Journal of Neuroscience*, 28(33).  
40 <https://doi.org/10.1523/JNEUROSCI.1093-08.2008>
- 41 Pleger, B., Ruff, C. C., Blankenburg, F., Bestmann, S., Wiech, K., Stephan, K. E., Capilla, A.,  
42 Friston, K. J., & Dolan, R. J. (2006). Neural Coding of Tactile Decisions in the Human  
43 Prefrontal Cortex. *Journal of Neuroscience*, 26(48).  
44 <https://doi.org/10.1523/JNEUROSCI.4275-06.2006>
- 45 Pleger, B., Ruff, C. C., Blankenburg, F., Klöppel, S., Driver, J., & Dolan, R. J. (2009).  
46 Influence of Dopaminergically Mediated Reward on Somatosensory Decision-Making.  
47 *PLoS Biology*, 7(7). <https://doi.org/10.1371/journal.pbio.1000164>

- 1 Preuschhof, C., Heekeren, H. R., Taskin, B., Schubert, T., & Villringer, A. (2006). Neural  
2 Correlates of Vibrotactile Working Memory in the Human Brain. *Journal of*  
3 *Neuroscience*, 26(51). <https://doi.org/10.1523/JNEUROSCI.2767-06.2006>
- 4 Puckett, A. M., Bollmann, S., Barth, M., & Cunnington, R. (2017). Measuring the effects of  
5 attention to individual fingertips in somatosensory cortex using ultra-high field (7T)  
6 fMRI. *NeuroImage*, 161. <https://doi.org/10.1016/j.neuroimage.2017.08.014>
- 7 Reynolds, J. H., Pasternak, T., & Desimone, R. (2000). Attention Increases Sensitivity of V4  
8 Neurons. *Neuron*, 26(3). [https://doi.org/10.1016/S0896-6273\(00\)81206-4](https://doi.org/10.1016/S0896-6273(00)81206-4)
- 9 Roland, P. E. (1981). Somatotopical tuning of postcentral gyrus during focal attention in  
10 man. A regional cerebral blood flow study. *Journal of Neurophysiology*, 46(4).  
11 <https://doi.org/10.1152/jn.1981.46.4.744>
- 12 Romo, R., & Rossi-Pool, R. (2020). Turning Touch into Perception. *Neuron*, 105(1).  
13 <https://doi.org/10.1016/j.neuron.2019.11.033>
- 14 Romo, R., & Salinas, E. (2003). Flutter Discrimination: neural codes, perception, memory  
15 and decision making. *Nature Reviews Neuroscience*, 4(3).  
16 <https://doi.org/10.1038/nrn1058>
- 17 Rose, N. S., LaRocque, J. J., Riggall, A. C., Gosseries, O., Starrett, M. J., Meyering, E. E., &  
18 Postle, B. R. (2016). Reactivation of latent working memories with transcranial  
19 magnetic stimulation. *Science*, 354(6316). <https://doi.org/10.1126/science.aah7011>
- 20 Rousseeuw, P. J., & Croux, C. (1993). Alternatives to the Median Absolute Deviation. *Journal*  
21 *of the American Statistical Association*, 88(424).  
22 <https://doi.org/10.1080/01621459.1993.10476408>
- 23 Sanchez Panchuelo, R. M., Besle, J., Schluppeck, D., Humberstone, M., & Francis, S. (2018).  
24 Somatotopy in the Human Somatosensory System. *Frontiers in Human Neuroscience*,  
25 12. <https://doi.org/10.3389/fnhum.2018.00235>
- 26 Sanders, Z.-B., Wesselink, D. B., Dempsey-Jones, H., & Makin, T. R. (2019). Similar  
27 somatotopy for active and passive digit representation in primary somatosensory cortex.  
28 *BioRxiv*.
- 29 Schmidt, T. T., & Blankenburg, F. (2018). Brain regions that retain the spatial layout of  
30 tactile stimuli during working memory – A ‘tactospacial sketchpad’? *NeuroImage*, 178.  
31 <https://doi.org/10.1016/j.neuroimage.2018.05.076>
- 32 Schmidt, T. T., & Blankenburg, F. (2019). The Somatotopy of Mental Tactile Imagery.  
33 *Frontiers in Human Neuroscience*, 13. <https://doi.org/10.3389/fnhum.2019.00010>
- 34 Schmidt, T. T., Schröder, P., Reinhardt, P., & Blankenburg, F. (2021). Rehearsal of tactile  
35 working memory: Premotor cortex recruits two dissociable neuronal content  
36 representations. *Human Brain Mapping*, 42(1). <https://doi.org/10.1002/hbm.25220>
- 37 Schmidt, T. T., Wu, Y., & Blankenburg, F. (2017). Content-Specific Codes of Parametric  
38 Vibrotactile Working Memory in Humans. *The Journal of Neuroscience*, 37(40).  
39 <https://doi.org/10.1523/JNEUROSCI.1167-17.2017>
- 40 Scobey, R. P., & Gabor, A. J. (1989). Orientation discrimination sensitivity of single units in  
41 cat primary visual cortex. *Experimental Brain Research*, 77(2).  
42 <https://doi.org/10.1007/BF00274997>
- 43 Seriès, P., Latham, P. E., & Pouget, A. (2004). Tuning curve sharpening for orientation  
44 selectivity: coding efficiency and the impact of correlations. *Nature Neuroscience*,  
45 7(10). <https://doi.org/10.1038/nn1321>
- 46 Silver, M. A., & Kastner, S. (2009). Topographic maps in human frontal and parietal cortex.  
47 *Trends in Cognitive Sciences*, 13(11). <https://doi.org/10.1016/j.tics.2009.08.005>

- 1 Smith, S. M. (2002). Fast robust automated brain extraction. *Human Brain Mapping*, *17*(3).  
2 <https://doi.org/10.1002/hbm.10062>
- 3 Staines, W. R., Graham, S. J., Black, S. E., & McIlroy, W. E. (2002). Task-Relevant  
4 Modulation of Contralateral and Ipsilateral Primary Somatosensory Cortex and the  
5 Role of a Prefrontal-Cortical Sensory Gating System. *NeuroImage*, *15*(1).  
6 <https://doi.org/10.1006/nimg.2001.0953>
- 7 Stelzer, J., Chen, Y., & Turner, R. (2013). Statistical inference and multiple testing correction  
8 in classification-based multi-voxel pattern analysis (MVPA): Random permutations and  
9 cluster size control. *NeuroImage*, *65*. <https://doi.org/10.1016/j.neuroimage.2012.09.063>
- 10 Sterr, A., Shen, S., Zaman, A., Roberts, N., & Szameitat, A. (2007). Activation of SI is  
11 modulated by attention: a random effects fMRI study using mechanical stimuli.  
12 *NeuroReport*, *18*(6). <https://doi.org/10.1097/WNR.0b013e3280b07c34>
- 13 Vallat, R. (2018). Pingouin: statistics in Python. *Journal of Open Source Software*, *3*(31).  
14 <https://doi.org/10.21105/joss.01026>
- 15 Walther, A., Nili, H., Ejaz, N., Alink, A., Kriegeskorte, N., & Diedrichsen, J. (2016).  
16 Reliability of dissimilarity measures for multi-voxel pattern analysis. *NeuroImage*, *137*.  
17 <https://doi.org/10.1016/j.neuroimage.2015.12.012>
- 18 Wang, L., Bodner, M., & Zhou, Y.-D. (2013). Distributed neural networks of tactile working  
19 memory. *Journal of Physiology-Paris*, *107*(6).  
20 <https://doi.org/10.1016/j.jphysparis.2013.06.001>
- 21 Watson, A. B., & Pelli, D. G. (1983). Quest: A Bayesian adaptive psychometric method.  
22 *Perception & Psychophysics*, *33*(2). <https://doi.org/10.3758/BF03202828>
- 23 Weaverdyck, M. E., Lieberman, M. D., & Parkinson, C. (2020). Tools of the Trade  
24 Multivoxel pattern analysis in fMRI: a practical introduction for social and affective  
25 neuroscientists. *Social Cognitive and Affective Neuroscience*, *15*(4).  
26 <https://doi.org/10.1093/scan/nsaa057>
- 27 Wesselink, D. B., van den Heiligenberg, F. M., Ejaz, N., Dempsey-Jones, H., Cardinali, L.,  
28 Tarall-Jozwiak, A., Diedrichsen, J., & Makin, T. R. (2019). Obtaining and maintaining  
29 cortical hand representation as evidenced from acquired and congenital handlessness.  
30 *ELife*, *8*. <https://doi.org/10.7554/eLife.37227>
- 31 Wiestler, T., & Diedrichsen, J. (2013). Skill learning strengthens cortical representations of  
32 motor sequences. *ELife*, *2*. <https://doi.org/10.7554/eLife.00801>
- 33 Wu, Y., Uluç, I., Schmidt, T. T., Tertel, K., Kirilina, E., & Blankenburg, F. (2018).  
34 Overlapping frontoparietal networks for tactile and visual parametric working memory  
35 representations. *NeuroImage*, *166*. <https://doi.org/10.1016/j.neuroimage.2017.10.059>
- 36 Yousry, T. A., Schmid, U. D., Alkadhi, H., Schmidt, D., Peraud, A., Buettner, A., & Winkler,  
37 P. (1997). Localization of the motor hand area to a knob on the precentral gyrus. A new  
38 landmark. *Brain*, *120*(1), 141–157. <https://doi.org/10.1093/brain/120.1.141>
- 39 Zhao, D., & Ku, Y. (2018). Dorsolateral prefrontal cortex bridges bilateral primary  
40 somatosensory cortices during cross-modal working memory. *Behavioural Brain*  
41 *Research*, *350*. <https://doi.org/10.1016/j.bbr.2018.04.053>
- 42 Zhou, Y. D., & Fuster, J. M. (1996). Mnemonic neuronal activity in somatosensory cortex.  
43 *Proceedings of the National Academy of Sciences*, *93*(19).  
44 <https://doi.org/10.1073/pnas.93.19.10533>
- 45 Zhou, Y.-D., & Fuster, J. M. (2000). Visuo-tactile cross-modal associations in cortical  
46 somatosensory cells. *Proceedings of the National Academy of Sciences*, *97*(17).  
47 <https://doi.org/10.1073/pnas.97.17.9777>



1           Zuur, A. F., Ieno, E. N., & Elphick, C. S. (2010). A protocol for data exploration to avoid  
2           common statistical problems. *Methods in Ecology and Evolution*, 1(1).  
3           <https://doi.org/10.1111/j.2041-210X.2009.00001.x>  
4

5

6

7
